1 **The effect of cytoskeleton inhibitors on coccolith morphology in *Coccolithus braarudii***  
2 **and *Scyphosphaera apsteinii***

3

4 Gerald Langer<sup>1, \*</sup>, Ian Probert<sup>2</sup>, Alison Taylor<sup>3</sup>, Glenn M. Harper<sup>4</sup>, Colin Brownlee<sup>1,5</sup>, Glen  
5 Wheeler<sup>1,\*</sup>

6

7

8 <sup>1</sup>Marine Biological Association, The Laboratory, Citadel Hill, Plymouth. PL1 2PB.

9 <sup>2</sup>Station Biologique de Roscoff, 29680 Roscoff, France.

10 <sup>3</sup>Department of Biology and Marine Biology, University of North Carolina Wilmington,  
11 Wilmington, NC 28403-591.

12 <sup>4</sup>Plymouth Electron Microscopy Centre, University of Plymouth, Plymouth, PL4 8AA.

13 <sup>5</sup>School of Ocean and Earth Science, University of Southampton, Southampton, SO14 3ZH,  
14 UK.

15

16

17 \*Authors for correspondence: [gerald.langer@cantab.net](mailto:gerald.langer@cantab.net); [glw@mba.ac.uk](mailto:glw@mba.ac.uk)

18

19 Keywords: Coccolithophore, coccolith, calcification, cytoskeleton, actin, microtubule

20

21

22

23 **Abstract**

24 The calcite platelets of coccolithophores (Haptophyta), the coccoliths, are among the most  
25 elaborate biomineral structures. How these unicellular algae accomplish the complex  
26 morphogenesis of coccoliths is still largely unknown. It has long been proposed that the  
27 cytoskeleton plays a central role in shaping the growing coccoliths. Previous studies have  
28 indicated that disruption of the microtubule network led to defects in coccolith morphogenesis  
29 in *Emiliania huxleyi* and *Coccolithus braarudii*. Disruption of the actin network also led to  
30 defects in coccolith morphology in *E. huxleyi*, but its impact on coccolith morphology in *C.*  
31 *braarudii* was less clear, as coccolith secretion was largely inhibited under the conditions used.  
32 A more detailed examination of the role of actin and microtubule networks is therefore required  
33 to address the wider role of the cytoskeleton in coccolith morphogenesis. In this study, we have  
34 examined coccolith morphology in *C. braarudii* and *Scyphosphaera apsteinii* following  
35 treatment with the microtubule inhibitors vinblastine and colchicine (*S. apsteinii* only) and the  
36 actin inhibitor cytochalasin B. We found that all cytoskeleton inhibitors induced coccolith  
37 malformations, strongly suggesting that both microtubules and actin filaments are instrumental  
38 in morphogenesis. By demonstrating the requirement for the microtubule and actin networks  
39 in coccolith morphogenesis in diverse species, our results suggest that both of these  
40 cytoskeletal elements are likely to play conserved roles in defining coccolith morphology.

41

## 42 Introduction

43 Cocolithophores, haptophyte algae, are among the most important pelagic calcite  
44 producers (Baumann et al. 2004, Poulton et al., 2007, Ziveri et al., 2007). The calcite platelets  
45 (coccoliths) that form the cell covering display an intricate morphology including elaborately  
46 shaped crystals in the diploid life cycle stage (Young et al. 1999). Although definitive evidence  
47 for the precise function of calcification in coccolithophores has been difficult to obtain, it is  
48 likely that assembly of coccoliths into a protective coccosphere is central to their function  
49 (Monteiro et al 2016). For instance, it was shown that the interlocking coccosphere of *E. huxleyi*  
50 confers remarkable mechanical protection, and *C. braarudii* needs an intact coccosphere to  
51 divide (Jaya et al 2016, Walker et al 2018). The distinct, normal morphology of the coccoliths  
52 is required for the correct formation of the coccosphere (Young 1994, Henriksen et al. 2003,  
53 Bown et al 2004, Quintero-Torres et al 2006, Jaya et al. 2016, Walker et al. 2018).  
54 Morphogenesis of coccoliths is therefore a central element of coccolithophore eco-physiology  
55 and evolution. Despite this prime position in coccolithophore biology, the morphogenesis of  
56 coccoliths is not well understood. Just over a decade ago coccolith morphogenesis was still  
57 regarded as “the most enigmatic part of biomineralization” (Henriksen et al 2004, p. 726).  
58 Although some progress has been made in the last decade (see below), this statement has lost  
59 little of its edge.

60 While Huxley (1868) regarded coccoliths as of inorganic origin, it is now clear that the  
61 morphologies of coccolith crystals are not to be found in inorganically precipitated calcite  
62 (Young et al. 1999, Aquilano et al. 2016). Calcification in coccolithophores occurs  
63 intracellularly, allowing precise control of the chemical conditions for the precipitation of  
64 calcium carbonate. The coccolith develops in a specialised intracellular compartment, the  
65 coccolith vesicle (Dixon 1900, Wilbur and Watabe 1963), where calcium carbonate crystals  
66 are nucleated onto an organic baseplate to produce small, initially rhombic, crystals. The calcite  
67 crystals then undergo carefully controlled growth to produce mature coccoliths with distinctive  
68 morphologies for each species. The mature coccoliths are subsequently secreted to the cell  
69 surface, where they are arranged to form the coccosphere. The cytoskeleton likely plays several  
70 important roles in coccolithogenesis, including controlling the secretion of the coccolith vesicle  
71 to the cell surface. Significant research interest has focused on the requirement for the  
72 cytoskeleton in shaping the morphology of the developing coccolith.

73           The coccolith vesicle adopts the shape of the growing coccolith (Outka and Williams  
74 1971, Klaveness 1972, Westbroek et al. 1984, Probert et al. 2007), which has led to the  
75 hypothesis that the coccolith vesicle acts as dynamic mould for the developing coccolith  
76 (Klaveness 1972, 1976, Young et al. 1999). This view includes a controlled force that shapes  
77 the coccolith vesicle. Based on transmission electron microscopy (TEM) examination of  
78 developing coccoliths it was hypothesised that a fibrillar structure adjacent to the coccolith  
79 vesicle exerts this force (Klaveness 1972, 1976). This led to the idea that the fibrillar material,  
80 later equated with the cytoskeleton (Remak 1843, Freud 1882), is at the centre of the coccolith  
81 shaping machinery (Westbroek et al. 1984, Didymus et al. 1994, Marsh 1994, 1999, Young et  
82 al. 1999, 2009, Marsh et al. 2002). Although this hypothesis is widely accepted, the supporting  
83 evidence from TEM analysis remains somewhat ambiguous (Klaveness et al 1972, 1976). This  
84 ambiguity was not eliminated by later TEM studies (Westbroek et al. 1984, Taylor et al. 2007).  
85 Recently immunofluorescence microscopy has revealed a microtubule network in close contact  
86 with the coccolith vesicle in *C. braarudii* (Durak et al. 2017). This observation complements  
87 the earlier TEM studies and strongly supports the original dynamic mould hypothesis  
88 (Klaveness 1972, 1976).

89           The cytoskeleton is central to many aspects of cellular function. Whilst many chemical  
90 inhibitors exist that disrupt the function of the microtubule and actin networks within the cell,  
91 their use to examine specific processes is complicated by their potential to interfere with other  
92 aspects of cell physiology. However, Langer et al 2010 demonstrated that the application of  
93 microtubule and actin inhibitors to coccolithophores could be carefully titrated to partially  
94 disrupt cytoskeleton function without complete inhibition of cellular growth. Application of  
95 the microtubule inhibitor colchicine or the actin inhibitor cytochalasin B to the abundant  
96 bloom-forming species *Emiliana huxleyi* resulted in significant disruption of coccolith  
97 morphology. These malformations were not observed in other treatments that reduced growth  
98 rate (e.g. the photosynthesis inhibitor 3-(3,4-dichlorophenyl)-1,1-dimethylurea (DCMU)),  
99 leading to the conclusion that both actin and microtubules play a central role in controlling the  
100 morphology of the developing coccolith. These findings therefore provide experimental  
101 support for the dynamic mould hypothesis.

102           A subsequent study found similar effects on coccolith morphology in *Coccolithus*  
103 *braarudii* using the microtubule inhibitor nocodazole (Durak et al. 2017). The effect of  
104 disrupting actin in *C. braarudii* was however different, as it led to a complete inhibition of  
105 coccolith production. It is therefore possible that actin is not involved directly in coccolith

106 morphogenesis in *C. braarudii* but plays a more general role in coccolith production, such as  
107 the exocytosis of coccoliths, or that actin is needed to start the whole process of coccolith  
108 formation (see Durak et al. 2017). Considering that both TEM and immunofluorescence  
109 imaging (Taylor et al. 2007, Durak et al. 2017) have so far only provided evidence for the  
110 involvement of microtubules in morphogenesis, evidence for the role for actin in  
111 coccolithogenesis remains limited.

112         It is important to note that the pharmacological agents used to disrupt the cytoskeleton  
113 in these studies have distinct modes of action (Supplementary Table 1) (Langer 2010; Durak  
114 2017). Moreover, Langer et al 2010 examined coccolith morphology in *E. huxleyi* cells grown  
115 in test conditions for several generations, whereas Durak et al 2017 disrupted cytoskeletal  
116 networks in decalcified *C. braarudii* cells and then assessed their ability to recalcify. These  
117 methodological differences make it difficult to directly ascertain the wider requirement for  
118 actin in coccolith formation in coccolithophores.

119         We have therefore performed a detailed examination of the impact of cytoskeleton  
120 disruption on coccolith formation in two coccolithophore species. *C. braarudii* is a heavily  
121 calcified species that is abundant in temperate and sub-polar regions of the North Atlantic and  
122 contributes significantly to calcification in this regions (Daniels et al 2016). To obtain a broader  
123 picture of the effects of cytoskeleton inhibitors on coccolith morphology, we have additionally  
124 examined *Scyphosphaera apsteinii*. This dimorphic species produces two distinct coccolith  
125 types, the disc-like muraliths and the large barrel-shaped lopadoliths (Drescher 2012).  
126 Moreover, *S. apsteinii* is a member of the Zygodiscales and therefore occupies a distinct  
127 evolutionary lineage from *E. huxleyi* (Isochrysidales) and *C. braarudii* (Coccolithales). We  
128 have treated *C. braarudii* and *S. apsteinii* with a range of inhibitors that act to disrupt actin and  
129 microtubule function within the cell. We show that both components of the cytoskeleton play  
130 an important role in coccolith morphogenesis in these species.

## 131 **Material and Methods**

### 132 *Culture conditions*

133 Clonal cultures of *C. braarudii* (strain PLY182g) and *S. apsteinii* (strain RCC1456) were  
134 grown in aged (3 months), sterile-filtered (Stericup-GP Sterile Vacuum Filtration System, 0.22  
135  $\mu\text{m}$  pore size, polyethersulfone membrane, Merck) natural surface seawater sampled in the  
136 English Channel off Plymouth, UK (station E1: 50° 02.00' N, 4° 22.00' W) enriched with 100  
137  $\mu\text{M}$  nitrate, 6.25  $\mu\text{M}$  phosphate, 4  $\mu\text{M}$  silicate, 0.005  $\mu\text{M}$   $\text{H}_2\text{SeO}_3$ , 0.00314  $\mu\text{M}$   $\text{NiCl}_2$ , and trace  
138 metals and vitamins as in f/2 medium (Guillard 1975). Strain RCC1456 was obtained from the  
139 Roscoff Culture Collection (<http://www.sb-roscoff.fr/Phyto/RCC>), and strain PLY182g from  
140 the Plymouth Culture Collection (<https://www.mba.ac.uk/facilities/culture-collection#b7>).

141 Cultures were grown under a 16:8 light:dark cycle. Experiments were carried out at a light  
142 intensity of 50  $\mu\text{mol photons m}^{-2} \text{s}^{-1}$  in temperature controlled culture rooms. *C. braarudii*  
143 PLY182g was grown at 15 °C, and *S. apsteinii* was grown at 18 °C. Cells were grown in dilute  
144 batch cultures, ensuring a quasi-constant seawater carbonate system over the course of the  
145 experiment (Langer et al. 2013). Each data point is the mean value of triplicate culture  
146 experiments. Error bars represent SD.

147 For determination of cell density, samples were taken every other day (or less frequently,  
148 depending on growth rate) and counted immediately after sampling using a Sedgwick Rafter  
149 Counting Cell. Cell densities were plotted versus time, and growth rate ( $\mu$ ) was calculated from  
150 exponential regression using the natural logarithm.

### 151 *Application of cytoskeleton inhibitors*

152 Colchicine, vinblastine, and cytochalasin B were obtained from Sigma-Aldrich (Munich,  
153 Germany).

154 Vinblastine was dissolved in reverse osmosis water. The concentration of the stock solution  
155 was 1.1 mM. *C. braarudii* was treated with a final vinblastine concentration of 2  $\mu\text{M}$ , and *S.*  
156 *apsteinii* with a final vinblastine concentration of 1.25  $\mu\text{M}$ .

157 Colchicine was dissolved in culture medium. The concentration of the stock solution was 2.5  
158 mM. *S. apsteinii* was treated with a final colchicine concentration of 20  $\mu\text{M}$ .

159 Cytochalasin B stock solution (20.9 mM in DMSO) was obtained from Sigma-Aldrich  
160 (Munich, Germany). *C. braarudii* was treated with a final cytochalasin B concentration of 1.5

161  $\mu\text{M}$ , and *S. apsteinii* with a final cytochalasin B concentration of 1  $\mu\text{M}$ . Consequently, cells  
162 were exposed to a maximum DMSO concentration of 0.007 vol %. This DMSO concentration  
163 is harmless; it was shown that in *E. huxleyi* 0.5 vol % DMSO has no effect on growth rate  
164 (Langer et al. 2010). In confirmation *C. braarudii* and *S. apsteinii* grown in 0.01 vol % DMSO  
165 showed normal growth and, upon qualitative inspection by means of light microscopy, no  
166 notable increase in coccolith malformations.

167 All stock solutions were freshly prepared prior to the start of the experiments. Cells were  
168 exposed to cytoskeleton inhibitors for 25 d, after which samples were taken for analysis of  
169 coccolith morphology.

#### 170 *SEM analysis of coccolith morphology*

171 Samples for SEM analysis were filtered on polycarbonate filters (0.8  $\mu\text{m}$  pore-size), dried in a  
172 drying cabinet at 50°C for 24 h, then sputter-coated with gold-palladium using an Emitech  
173 K550 sputter coater at Plymouth Electron Microscopy Centre (PEMC). Imaging was performed  
174 with both Jeol JSM-6610LV and Jeol JSM-7001F at PEMC. The following categories were  
175 used to describe coccolith morphology. 1) *C. braarudii*: normal, malformation type R, minor  
176 malformation, major malformation, rhomb-like malformation. For reference images see Fig. 1.  
177 A preliminary analysis showed that the percentage of incomplete coccoliths was less than 1 %  
178 in all samples. Therefore, incomplete coccoliths were not accurately quantified in the final  
179 analysis. 2) *S. apsteinii*: normal, malformation type R, malformation type S, malformation type  
180 T. For reference images see Fig. 5. An average of  $\sim 350$  coccoliths was analysed per sample  
181 (Langer and Benner 2009). The methodology of coccolith categorization and counting  
182 employed here is well established and yields robust and unbiased results (Langer et al. 2006;  
183 Langer and Benner 2009; Langer and Bode 2011; Langer et al. 2011; Langer et al. 2012, Bach  
184 et al. 2012). The percentage of intact, as opposed to collapsed, coccospheres was analysed in  
185 the same samples as coccolith morphology. An average of  $\sim 300$  coccospheres was analysed  
186 per sample. Data presented in the figures are averages of triplicate cultures; error bars represent  
187 SD. The percentage of intact coccospheres was only analysed in *C. braarudii* because *S.*  
188 *apsteinii* coccoliths do not interlock and show high percentages of collapsed coccospheres in  
189 all samples. Please note that coccospheres that collapse during preparation for SEM imaging  
190 could well have been perfectly intact in culture. Preparation for SEM imaging imposes  
191 mechanical stress on coccospheres that often leads to the collapse of non-interlocking  
192 coccospheres such as those of *S. apsteinii*. By contrast, interlocking coccospheres have

193 exceptional mechanical stability (Jaya et al. 2016) which, in principle, enables them to resist  
194 the forces imposed by SEM preparation. When coccoliths are severely malformed, however,  
195 the interlocking is impaired and coccospheres are more likely to collapse.



## 196 **Results**

### 197 **Effects of cytoskeletal inhibitors on *C. braarudii***

198 To examine the impacts of disrupting the cytoskeleton on coccolith formation in *C.*  
199 *braarudii*, we treated cells with the microtubule inhibitor vinblastine and the actin inhibitor  
200 cytochalasin B. As the cytoskeleton is essential for cell division and many other cellular  
201 processes, a total disruption of cytoskeletal function would prevent cell growth or secretion of  
202 coccoliths. We therefore performed a series of pre-experiments to determine inhibitor  
203 concentrations that allow the cells to continue to grow at a reduced growth rate, indicating that  
204 the inhibitor disrupts the cytoskeleton to some extent but does not completely impair secretion  
205 or cell division.

206 Growth of *C. braarudii* cells in 2  $\mu$ M cytochalasin B to disrupt actin networks resulted  
207 in a 58% reduction in growth rate (Fig 1). Application of 1.25  $\mu$ M vinblastine to disrupt  
208 microtubule function reduced growth by 66%. Scanning electron microscopy (SEM) was then  
209 used to examine coccolith morphology in these cultures. Despite the similar reduction in  
210 growth rate, the effects of the two different inhibitors on coccolith morphology were markedly  
211 different. In general, the effects of cytochalasin B were more severe than the ones of  
212 vinblastine. In particular, the percentage of major malformations (0.0% in the control) rose to  
213  $7.3 \pm 0.5$  % under the influence of vinblastine but to  $17.7 \pm 1.1$  % under cytochalasin B  
214 treatment (n=3,  $\pm$  SD) (Fig 2). The level of minor malformations did not differ between the two  
215 inhibitors.

216 The effects on coccolith morphology following cytoskeletal disruption was reflected in  
217 the percentage of intact coccospheres present during SEM analysis. Whilst control cells  
218 displayed  $98.1 \pm 0.9$  % intact coccospheres, only  $88.3 \pm 5.9$  % of coccospheres were intact  
219 after treatment with 1.25  $\mu$ M vinblastine and only  $31.1 \pm 1.2$  % after treatment with 2  $\mu$ M  
220 cytochalasin B (n=3,  $\pm$  SD) (Fig 3A-C). Since minor malformations by definition do not affect  
221 the double shield architecture that is instrumental in forming an interlocking coccosphere,  
222 coccoliths displaying minor malformations are still able to integrate normally into the  
223 coccosphere. Coccoliths displaying major malformations, by contrast, do not interlock and  
224 therefore make the coccosphere unstable. This is reflected in the correlation between intact  
225 coccospheres and major malformations (Fig 3C). The dependence of intact coccospheres on  
226 coccolith morphology was also observed in *Calcidiscus leptoporus* but was not quantified  
227 (Langer et al. 2006, Langer and Bode 2011). The relationship between coccolith morphology

228 and coccosphere integrity highlights the importance of coccolith morphogenesis in  
229 coccolithophore ecology and evolution. The significance of an intact coccosphere has at least  
230 two aspects. First, an interlocking coccosphere has remarkable mechanical properties (Jaya et  
231 al. 2016) which will be impaired by heavily malformed coccoliths. Second, *C. braarudii* cannot  
232 grow without a coccosphere (Walker et al. 2018).

### 233 **Effects of cytoskeletal inhibitors on *S. apsteinii***

234 We grew *S. apsteinii* in the presence of the microtubule inhibitors vinblastine and  
235 colchicine, and the actin inhibitor cytochalasin B. Treatment with 1.25  $\mu$ M vinblastine and 20  
236  $\mu$ M colchicine for reduced the growth rate by 39% and 57% respectively (Fig 4). Treatment  
237 with 1  $\mu$ M cytochalasin B for ca 20 days reduced the growth rate by 35%. The inhibitor  
238 concentrations used to cause a moderate reduction in growth rate in *S. apsteinii* are therefore  
239 similar to those in *C. braarudii*. However, these concentrations are markedly different from *E.*  
240 *huxleyi* (Langer et al. 2010) (Supplementary Table 1), which may point to differences between  
241 species in the types of actin and microtubules (Thompson et al. 1984, Gunning et al. 2015,  
242 Howes et al. 2018) or in the uptake of the inhibitors.

243 The cytoskeleton inhibitors also had pronounced effects on coccolith morphology in *S.*  
244 *apsteinii*. We did not quantify the effects of cytoskeletal disruption on murolith morphology,  
245 although a qualitative analysis indicated that murolith malformations increased under all tested  
246 inhibitors (Supplementary Figure 1). Quantitative analysis of lopadolith morphology revealed  
247 a similar morphological response to all tested inhibitors (Fig 5). The proportion of Type S, type  
248 T and type R malformations increased in under all treatments, with the proportion of normal  
249 coccoliths decreasing from 87% in control cultures to 36-54% in the presence of cytoskeleton  
250 inhibitors. As the nature of the malformations are similar between all treatments, we conclude  
251 that disruption of either the microtubule or actin networks have similar effects on coccolith  
252 morphology. It is interesting nonetheless that the treatment that had the greatest impact on  
253 growth (colchicine) did not have the greatest impact on morphology (cytochalasin B).

254 The coccoliths of *S. apsteinii* do not interlock, unlike those found on *C. braarudii* and  
255 *E. huxleyi*, and so do not usually remain intact during sample preparation for SEM analysis.  
256 We therefore did not quantify collapsed coccospheres.

257

## 258 Discussion

259 Our results suggest that both microtubules and actin filaments are involved in coccolith  
260 morphogenesis in *C. braarudii* and *S. apsteinii*, in support of previous findings in *E. huxleyi*  
261 (Langer et al 2010). Unlike the application of the silicon analogue germanium, which results  
262 in distinct types of malformed coccoliths in *C. braarudii* and *S. apsteinii* (Langer et al 2021),  
263 the malformations induced by disruption of the cytoskeleton were not specific to this stress  
264 (Giraudeau et al. 1993, Langer et al. 2006, Benner 2008, Gerecht et al. 2015). Although  
265 cytoskeletal inhibitors did not cause specific malformations, the effects on coccolith  
266 morphogenesis are unlikely to be simply a result of general cellular stress. Disruption of  
267 coccolith formation did not simply correlate with inhibition of growth, as treatments that gave  
268 the greatest inhibition of growth (e.g. colchicine to *C. braarudii*) did not result in the highest  
269 degree of coccolith malformations (Fig 3 & 5). This also supports observations from *E. huxleyi*  
270 that growth inhibition via other mechanisms, such as the inhibition of photosynthesis, do not  
271 result in an increase in coccolith malformations (Langer 2010). We therefore propose that the  
272 malformations we observe point to a requirement for both actin and microtubules in shaping  
273 the developing coccolith.

274 Disruption of actin networks with cytochalasin B in *C. braarudii* or *S. apsteinii* did not  
275 have a distinct effect on coccolith morphology from the disruption of microtubules with either  
276 colchicine or vinblastine, suggesting that both components of the cytoskeleton contribute to  
277 similar aspects of coccolithogenesis. This finding differs from an earlier study where disruption  
278 of actin with latrunculin B in *C. braarudii* inhibited coccolith secretion, suggesting a specific  
279 role for actin in this process (Durak 2017). There are several explanations for these differing  
280 results. The phenotypic difference may simply reflect a difference in the effective concentration  
281 of the inhibitor applied, as it is difficult to gauge the extent to which the actin network has been  
282 disrupted in the two studies. The differing phenotypes may also result from the differences in  
283 the mode of action of latrunculin B and cytochalasin B. While the former depolymerizes actin  
284 the latter caps actin filaments thereby reducing polymerization rate (MacLean-Fletcher and  
285 Pollard 1980, Forscher and Smith 1988, Gibbon et al. 1999, Foissner and Wasteneys 2007).  
286 Differences in the experimental protocols may also have contributed to the different  
287 phenotypes. Whilst the current study observed coccolith production over several generations,  
288 Durak et al 2017 observed production of new coccoliths 24 h after decalcification. Whilst this  
289 has the advantage of ensuring that only coccoliths produced following the application of the

290 treatment are observed, the process of decalcification itself may induce malformations  
291 (unpublished observations G. Langer 2017)

292 Durak et al. (2017) observed only a few heavily malformed coccoliths in SEM samples  
293 from *C. braarudii* cultures treated with latrunculin B and hypothesised that these arose from  
294 intracellular coccoliths that had not been secreted. The nature of these malformations differ  
295 from those observed in response to cytochalasin B or in response to other stressors (Giraudeau  
296 et al. 1993, Langer et al. 2006, Benner 2008, Gerecht et al. 2015). It is therefore possible that  
297 the decalcification process contributed to these unusual malformations. In support of this  
298 conclusion, similar malformations were also observed in recalcifying cells in response to the  
299 microtubule inhibitor nocodazole (17  $\mu$ M) (Durak 2017), but were not seen in the current study  
300 following treatment with 2  $\mu$ M vinblastine. Again, these phenotypic differences could be due  
301 to differences in the concentration of inhibitor applied or their mode of action. Both nocodazole  
302 and vinblastine stabilize microtubule ends at nanomolar concentrations but depolymerize them  
303 at micromolar concentrations (Jordan et al. 1992). A difference in their effect on coccolith  
304 morphogenesis could therefore stem from the different concentrations used. However, given  
305 the relatively high proportion of malformations in recalcifying control cells, it is likely that the  
306 unusual malformations observed in response to nocodazole are the result of a combined effect  
307 of decalcification and nocodazole (Durak et al. 2017).

308 Disruption of the cytoskeleton could potentially influence the calcification processes in  
309 multiple ways, from the intracellular transport of substrates to the coccolith vesicle, to the direct  
310 shaping of the coccolith vesicle and the exocytosis of the mature coccolith (Durak 2017).  
311 Disruption of the morphogenetic role of the cytoskeleton implies that cytoskeleton inhibitors  
312 should cause teratological malformations, rather than incomplete growth (Young and  
313 Westbroek 1991). Incomplete coccoliths may arise if transport of substrates to the coccolith  
314 vesicle is disrupted, or if the cytoskeleton is involved in the cellular ‘stop signal’ that prevents  
315 further crystal growth following the formation of a fully mature coccolith. In the present study,  
316 we found little evidence for the presence of incomplete coccoliths following disruption of the  
317 cytoskeleton in *C. braarudii*. We did not quantify incomplete coccoliths in *C. braarudii*  
318 because a preliminary analysis revealed that the percentage of incomplete coccoliths in all  
319 samples was less than 1%. The presence of incomplete coccoliths in *S. apsteinii* is slightly more  
320 difficult to resolve because it is not entirely clear whether the S-type malformation should be  
321 classified as incomplete, malformed (in the strict teratological sense), or normal. The S-type  
322 category is a short lopadolith (i.e. the length of the barrel is reduced) with no obvious

323 teratological malformation. While this might seem to suggest that it should count as  
324 incomplete, there are several observations from different cultures suggesting that there is a  
325 great variability in lopadolith size including S-type-size (not quantified). Given this variability,  
326 it is possible that we should consider the S-type morphology as normal, rather than a  
327 malformation. However, as the S-type morphology is more abundant in response to  
328 cytoskeletal inhibitors, it does appear to represent a genuine effect, albeit an effect on size  
329 rather than “completeness”. The distinction between size and incompleteness is harder to define  
330 in *S. apsteinii* than in *E. huxleyi*, in which incomplete coccoliths can be clearly identified by  
331 the absence of a well-defined rim while complete coccoliths can exhibit different sizes (Langer  
332 et al. 2010, Rosas-Navarro et al. 2016). The example of *E. huxleyi* shows that, from a  
333 mechanistic point of view, there is a distinction between size and incompleteness. An  
334 incomplete coccolith represents a situation where crystal growth was stopped too early, so that  
335 the coccolith does not possess all the normal structural features, i.e. the cellular “stop-signal”  
336 was not given correctly. This situation is therefore distinct from a normal coccolith of small  
337 size. In terms of *S. apsteinii*, this means that the increase in the S-type morphology in response  
338 to cytoskeleton inhibitors does not indicate a connection between the “stop-signal” for  
339 coccolith growth and the cytoskeleton. The absence of an increase in incomplete coccoliths in  
340 *C. braarudii* (this study) or *E. huxleyi* (Langer et al. 2010) further suggests that cytoskeleton  
341 inhibitors applied in this manner do not affect the stop-signal for coccolith growth.

342         In summary, our findings show that both actin filaments and microtubules are involved  
343 in coccolith morphogenesis in *C. braarudii* (Coccolithales) and *S. apsteinii* (Zygodiscales).  
344 Taken together with previous findings in *E. huxleyi* (Isochrysidales) data (Langer et al. 2010),  
345 this strongly suggests that these two cytoskeleton elements play a central role in coccolith  
346 morphogenesis in coccolithophores. Detailed examination of the mechanisms through which  
347 the actin and microtubules interact to influence the shape of the coccolith vesicle as the  
348 coccolith matures is now required to fully test the ‘dynamic mould’ hypothesis. To achieve this  
349 novel high-resolution imaging techniques, which preserve sub-cellular features, such as cryo-  
350 FIB-SEM will likely be helpful. These highly specialised electron microscopy applications are  
351 difficult and time consuming, but the results of this study show that the effort is worthwhile.  
352 Our data suggest that the cytoskeleton is at the heart of coccolith morphogenesis.

353 **Acknowledgements**

354 The work was supported by an NERC award to GLW (NE/N011708/1), an NSF-GEO award  
355 to ART (1638838), and an ERC Advanced Grant to CB (ERC-ADG-670390). Electron  
356 microscopy analyses were performed at the PEMC (Plymouth University, UK). The authors  
357 declare no competing interests.

358

359 **References**

- 360 Aquilano, D., Otálora, F., Pastero, L., García-Ruiz, J.M. (2016) Three study cases of growth  
361 morphology in minerals: Halite, calcite and gypsum, Progress in Crystal Growth and  
362 Characterization of Materials, 62, 227-251
- 363 Bach LT, Bauke C, Meier KJS, Riebesell U, Schulz KG (2012) Influence of changing  
364 carbonate chemistry on morphology and weight of coccoliths formed by *Emiliana huxleyi*.  
365 Biogeosciences 9:3449–3463
- 366 Baumann, K.-H., Böckel, B., Frenz, M., 2004. Coccolith contribution to South Atlantic  
367 carbonate sedimentation. In: Thierstein, H.R., Young, J.R. (Eds.), Coccolithophores: from  
368 Molecular Processes to Global Impact. Springer, Berlin, pp. 367–402
- 369 Benner I. 2008. The utilization of organic nutrients in marine phytoplankton with emphasis  
370 on coccolithophores, PhD thesis, University of Bremen, Germany.
- 371 Bown, P.R., Lees, J.A., and Young, J.R. (2004). Calcareous nannoplankton evolution and  
372 diversity through time. Coccolithophores—From Molecular Processes to Global Impact. H.  
373 R. Thierstein and J. R. Young, eds. Springer Verlag, pp. 481–505
- 374 Daniels CJ, Poulton AJ, Young JR, Esposito M and others (2016) Species-specific calcite  
375 production reveals *Coccolithus pelagicus* as the key calcifier in the Arctic Ocean. Mar. Ecol.  
376 Prog. Ser. 555:29-47
- 377 Drescher, B., Dillaman, R. M. and Taylor, A. R. (2012) Coccolithogenesis in *Scyphosphaera*  
378 *apsteinii* (Prymnesiophyceae). J. Phycol. 48, 1343-1361
- 379 Didymus, J. M., Young, J. R. & Mann, S. 1994. Construction and morphogenesis of the  
380 chiral ultrastructure of coccoliths from marine alga *Emiliana huxleyi*. Proc. R. Soc. Lond. B  
381 Biol. Sci. 258:237–45.
- 382 Dixon, H. H. (1900) On the structure of coccospheres and the origin of coccoliths. Proc. R.  
383 Soc. Lond. 66: 305–15
- 384 Durak, G.M., Brownlee, C., Wheeler, G. (2017) The role of the cytoskeleton in  
385 biomineralisation in haptophyte algae. Scientific Reports, 15409

- 386 Foissner I., Wasteneys G.O. (2007) Wide-ranging effects of eight cytochalasins and  
387 latrunculin A and B on intracellular motility and actin filament reorganization in characean  
388 internodal cells. *Plant Cell Physiol.* 48(4): 585-97
- 389 Forscher, P., Smith, S.J. (1988) Actions of cytochalasins on the organization of actin  
390 filaments and microtubules in a neuronal growth cone. *J. Cell Biol.* 107, 1505-1516
- 391 Freud, S. 1882. Ueber den Bau der Nervenfasern und Nervenzellen beim Flusskrebs.  
392 *Sitzungsber. Akad. Wien Math-Naturwiss. Classe* 85:9–46.
- 393 Gerecht, A. C., Supraha, L., Edvardsen, B., Langer, G., Henderiks J. (2015) Phosphorus  
394 availability modifies carbon production in *Coccolithus pelagicus* (Haptophyta). *J. Exp. Mar.*  
395 *Biol. Ecol.* 472, 24–31
- 396 Gerecht, A. C., Šupraha, L., Langer, G., and Henderiks, J. (2018) Phosphorus limitation and  
397 heat stress decrease calcification in *Emiliania huxleyi*, *Biogeosciences*, 15, 833-845
- 398 Gibbon, B.C., Kovar, D.R., Staiger, C.J. (1999) Latrunculin B Has different effects on pollen  
399 germination and tube growth. *The Plant Cell* 11 (12): 2349-2363
- 400 Giraudeau, Monteiro, P.M.S., Nikodemus, K. (1993) Distribution and malformation of living  
401 coccolithophores in the northern Benguela upwelling system off Namibia. *Mar.*  
402 *Micropaleontol.* 22, 93-110
- 403 Guillard, R.R.L. (1975) Culture of phytoplankton for feeding marine invertebrates. In Smith,  
404 W. L. & Chanley, M. H. [Eds.] *Culture of Marine Invertebrate Animals*. Plenum Press, New  
405 York, pp. 29–60
- 406 Gunning, P.W., Ghoshdastider, U., Whitaker, S., Popp, D., Robinson, R.C. (2015) The  
407 evolution of compositionally and functionally distinct actin filaments. *J. Cell Sci.* 128: 2009-  
408 2019
- 409 Henriksen, K., Stipp, S.L.S., Young, J.R. & Bown, P.R. 2003. Tailoring calcite: Nanoscale  
410 AFM of coccolith biocrystals. *American Mineralogist* 88: 2040-2044
- 411 Henriksen, K., Young, J. R., Bown, P. R. & Stipp, S. L. S. (2004) Coccolith  
412 biomineralisation studied with atomic force microscopy. *Palaeontology* 47:725–43



- 413 Howes, S.C., Geyer, E.A., LaFrance, B., Zhang, R., Kellogg, E.H., Westermann, S., Rice,  
414 L.M., Nogales, E. (2018) Structural and functional differences between porcine brain and  
415 budding yeast microtubules, *Cell Cycle* 17:3, 278-287
- 416 Huxley, T.H. (1868) On some organisms living at great depth in the North Atlantic Ocean.  
417 *Quart. J. of Microscopical Sci.* 8, 203-212
- 418 Jaya, B.N., R. Hoffmann, C. Kirchlechner, G. Dehm, C. Scheu, G. Langer (2016)  
419 Coccospheres confer mechanical protection: New evidence for an old hypothesis, *Acta*  
420 *Biomaterialia*, Volume 42, Pages 258-264
- 421 Jordan, M. A., Thrower, D. & Wilson, L. (1992) Effects of vinblastine, podophyllotoxin and  
422 nocodazole on mitotic spindles. Implications for the role of microtubule dynamics in mitosis.  
423 *J. of Cell Sci.* 102, 401–416
- 424 Klaveness, D. 1972. *Coccolithus huxleyi* (Lohmann) Kamptner. I. Morphologic investigations  
425 on the vegetative cell and the process of coccolith formation. *Protistologica* 8:335–46.
- 426 Klaveness, D. 1976. *Emiliana huxleyi* (Lohmann) Hay and Mohler. III. Mineral deposition  
427 and the origin of the matrix during coccolith formation. *Protistologica* 12:217–24.
- 428 Langer G, Benner I (2009) Effect of elevated nitrate concentration on calcification in  
429 *Emiliana huxleyi*. *J. Nanoplankton Res.* 30:77–80
- 430 Langer G, Bode M (2011) CO<sub>2</sub> mediation of adverse effects of seawater acidification in  
431 *Calcidiscus leptoporus*. *Geochem. Geophys. Geosyst.* 12:Q05001. doi:  
432 10.1029/2010GC003393
- 433 Langer G, de Nooijer LJ, Oetjen K. (2010) On the role of the cytoskeleton in coccolith  
434 morphogenesis: the effect of cytoskeleton inhibitors. *J. Phycol.* 46:1252–56
- 435 Langer G, Geisen M, Baumann K-H, Kläs J, Riebesell U, Thoms S, Young JR (2006)  
436 Species-specific responses of calcifying algae to changing seawater carbonate chemistry.  
437 *Geochem. Geophys. Geosyst.* 7:Q09006. doi: 10.1029/2005GC001227
- 438 Langer G, Oetjen K, Brenneis T (2012) Calcification of *Calcidiscus leptoporus* under  
439 nitrogen and phosphorus limitation. *J. Exp. Mar. Biol. Ecol.* 413:131–137
- 440 Langer, G., Oetjen, K. & Brenneis, T. (2013) On culture artefacts in coccolith morphology.  
441 *Helgol. Mar. Res.* 67: 359-369

- 442 Langer G, Probert I, Nehrke G, Ziveri P (2011) The morphological response of *Emiliania*  
443 *huxleyi* to seawater carbonate chemistry changes: an inter-strain comparison. J  
444 Nannoplankton Res. 32:27–32
- 445 Langer, G., Taylor, A.R., Walker, C.E., Meyer, E.M., Ben Joseph, O., Gal, A., Harper, G.M.,  
446 Probert, I., Brownlee, C. and Wheeler, G.L. (2021), The role of silicon in the development of  
447 complex crystal shapes in coccolithophores. New Phytol. <https://doi.org/10.1111/nph.17230>
- 448 MacLean-Fletcher, S., Pollard, T.D. (1980) Mechanism of action of cytochalasin B on actin.  
449 Cell 20, 329-341
- 450 Marsh, M. E. 1994. Polyanion-mediated mineralization – assembly and reorganization of  
451 acidic polysaccharides in the Golgi system of a coccolithophorid alga during mineral  
452 deposition. Protoplasma 177:108–22.
- 453 Marsh, M. E. 1999. Coccolith-crystals of *Pleurochrysis carterae*: crystallographic faces,  
454 organization, and development. Protoplasma 207:54–66.
- 455 Marsh, M. E., Ridall, A. L., Azadi, O. & Duke, P. J. 2002. Galacturonomannan and Golgi-  
456 derived membrane linked to growth and shaping of biogenic calcite. J. Struct. Biol. 139:39–  
457 45.
- 458 Monteiro FM, Bach LT, Brownlee C, Bown P, Rickaby REM, Poulton AJ, et al. (2016) Why  
459 marine phytoplankton calcify. Science Advances; 2(7).  
460 <https://doi.org/10.1126/sciadv.1501822> PMID: 27453937
- 461 Outka, D. E. & Williams, D. C. 1971. Sequential coccolith morphogenesis in *Hymenomonas*  
462 *carterae*. J. Protozool. 18:285–97.
- 463 Poulton AJ, Adey TR, Balch WM, Holligan PM. 2007. Relating coccolithophore calcification  
464 rates to phytoplankton community dynamics: regional differences and implications for carbon  
465 export. Deep Sea Research Part II: Topical Studies in Oceanography 54: 538–557
- 466 Probert, I., Fresnel, J., Billard, C., Geisen, M. & Young, J. R. 2007. Light and electron  
467 microscope observations of *Algirosphaera robusta* (Prymnesiophyceae). J. Phycol. 43:319–  
468 32.
- 469 Quintero-Torres, R., Aragón, J.L., Torres, M., Estrada, M. & Cros, L. (2006): Strong far-field  
470 coherent scattering of ultraviolet radiation by holococcolithophores. Phys. Rev. E 74: 32901

- 471 Remak, R. 1843. Ueber den Inhalt der Nervenprimitivroehren. Arch. Anat. Physiol. Wiss.  
472 Med. 1843:197–201.
- 473 Rosas-Navarro A, Langer G, Ziveri P. (2016) Temperature affects the morphology and  
474 calcification of *Emiliana huxleyi* strains. Biogeosciences, 13(10): 2913-2926
- 475 Rowson, J.D., Leadbeater, B.S.C., Green, J.C. (1986). Calcium carbonate deposition in the  
476 motile (Crystallolithus) phase of *Coccolithus pelagicus* (Prymnesiophyceae). Br. Phycol. J.  
477 21: 359–370
- 478 Taylor AR, Russell MA, Harper GM, Collins TFT, Brownlee C. 2007. Dynamics of  
479 formation and secretion of heterococcoliths by *Coccolithus pelagicus* ssp. braarudii. Eur. J.  
480 Phycol. 42:125–36
- 481 Thompson, W.C., Asai, D.J., Carney D.H. (1984) Heterogeneity among microtubules of the  
482 cytoplasmic microtubule complex detected by a monoclonal antibody to alpha tubulin. J. of  
483 Cell Biol. Mar 98 (3) 1017-1025
- 484 Walker, C. E., Taylor, A. R., Langer, G. , Durak, G. M., Heath, S. , Probert, I. , Tyrrell, T.,  
485 Brownlee, C. and Wheeler, G. L. (2018), The requirement for calcification differs between  
486 ecologically important coccolithophore species. New Phytol. 220: 147-162
- 487 Westbroek, P., De Jong, E. W., Van Der Wal, P., Borman, A. H., De Vrind, J. P. M., Kok, D.,  
488 De Bruijn, W. C. & Parker, S. B. 1984. Mechanism of calcification in the marine alga  
489 *Emiliana huxleyi*. Philos. Trans. R. Soc. Lond. B 304:435–44
- 490 Wilbur, K. M. & Watabe, N. 1963. Experimental studies on calcification in molluscs and the  
491 alga *Coccolithus huxleyi*. Ann. N. Y. Acad. Sci. 109: 82–112.
- 492 Young J. R. (1994) Functions of coccoliths. In Winter A., Siesser W. G. (eds),  
493 Coccolithophores. Cambridge University Press, Cambridge, UK, pp. 63–82
- 494 Young, J., Andruleit, H. & Probert, I. 2009. Coccolith function and morphogenesis: insights  
495 from appendage-bearing coccolithophores of the family Syracosphaeraceae (Haptophyta). J.  
496 Phycol. 45:213–26.
- 497 Young JR, Davis SA, Bown PR, Mann S. 1999. Coccolith ultrastructure and  
498 biomineralisation. J. Struct. Biol. 126:195–215

- 499 Young JR, Westbroek P (1991) Genotypic variation in the coccolithophorid species  
500 *Emiliana huxleyi*. Mar. Micropaleontol. 18:5–23
- 501 Ziveri P, de Bernardi B, Baumann K-H, Stoll HM, Mortyn PG. 2007. Sinking of coccolith  
502 carbonate and potential contribution to organic carbon ballasting in the deep ocean. Deep Sea  
503 Res. Part II: Topical Studies in Oceanography 54: 659–675

504 **Figure legends**

505

506

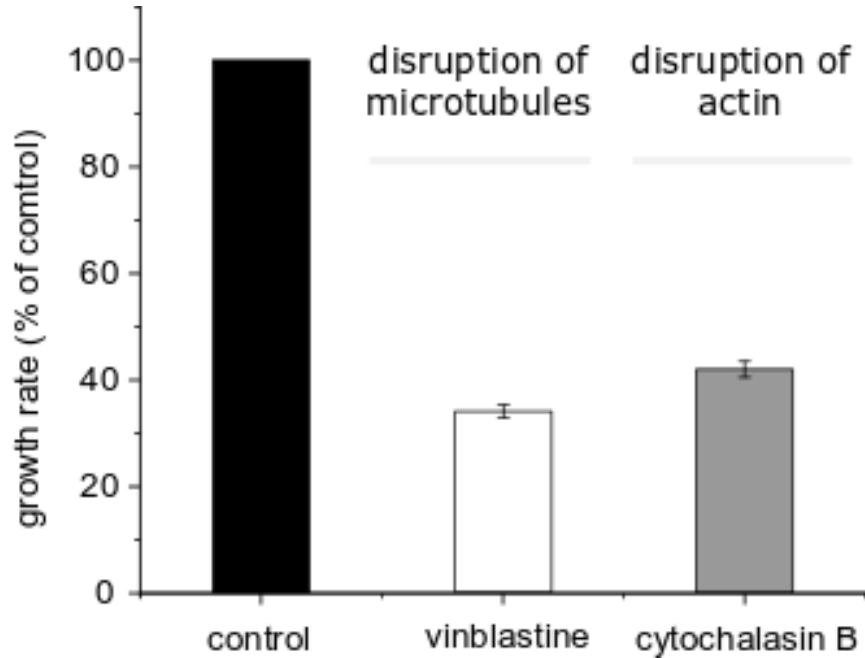

507

508

509 **Figure 1: Effects of cytoskeletal inhibitors on growth of *C. braarudii*.** A) Growth rate of *C.*  
510 *braarudii* following treatment with 1.25  $\mu$ M vinblastine or 2  $\mu$ M cytochalasin B. Growth is  
511 shown relative to control (untreated) cultures as the vinblastine and cytochalasin B treatments  
512 had separate controls (specific growth rates of the controls ranged from 0.5-0.6  $d^{-1}$ ).  $n = 3$   
513 cultures for each treatment. Error bars represent SD.

514

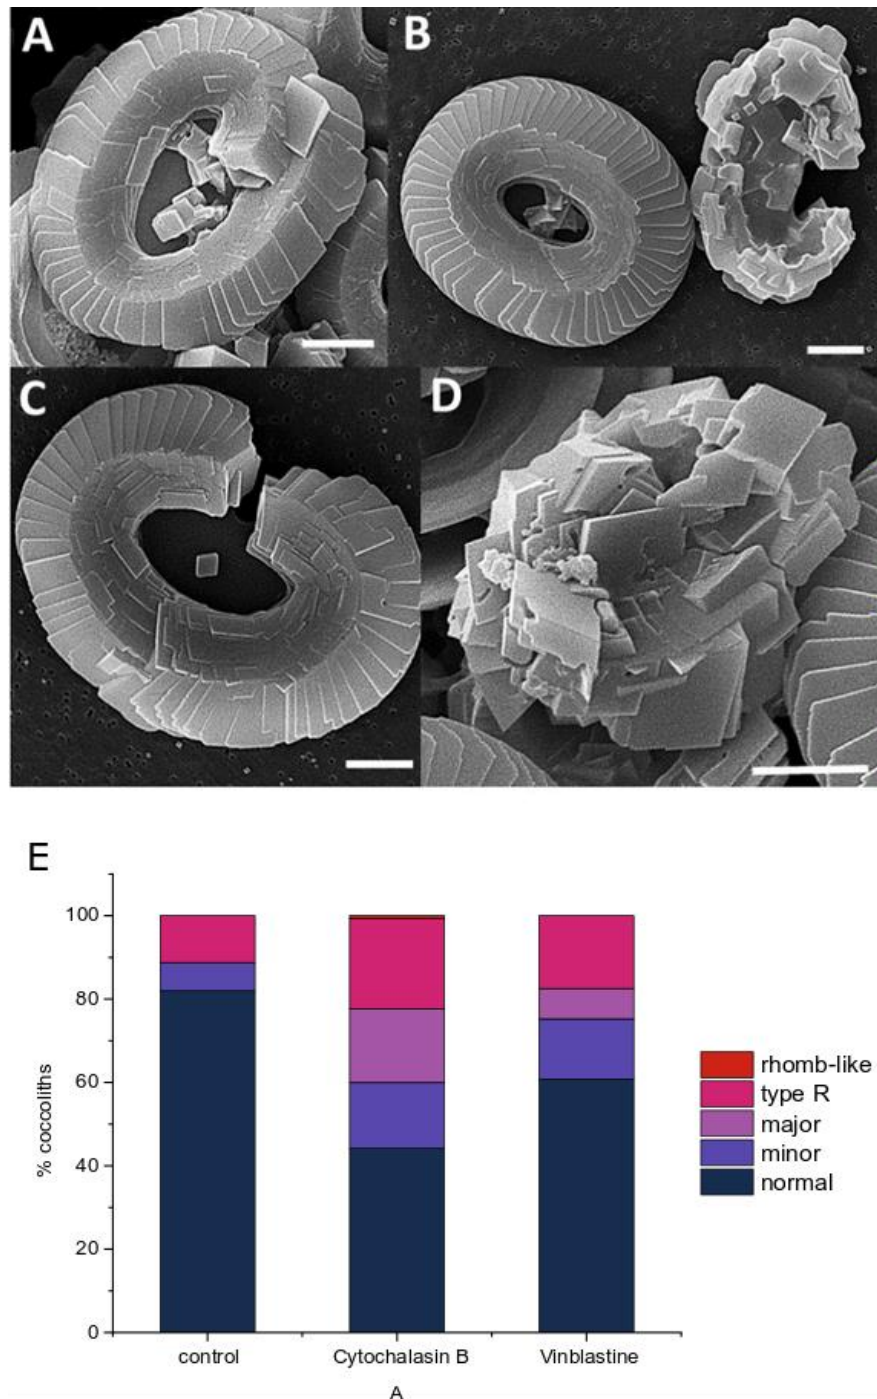

515

516 **Figure 2: Scanning electron micrographs of the morphological categories of *C. braarudii***  
517 **coccoliths.** Representative SEM images of the categories used to quantify coccolith  
518 morphology. A) minor malformation, shields largely intact but elements imperfect, B) normal  
519 coccolith (left) and major malformation (right) where shields are not correctly formed. C) type  
520 R, coccolith largely intact but the shields do not form a complete ring D) rhomb-like  
521 malformation, shields are not discernible, composed of 'blocky' calcite crystals. Scale bars 2  
522 μm. E) Quantification of coccolith morphology. Bars from bottom up represent the  
523 morphological categories (% of counted): normal, minor malformation, major malformation,

524 type R and rhomb-like malformation. A minimum of 300 coccoliths were assessed for each  
525 sample, with values representing means of triplicate treatments.

526

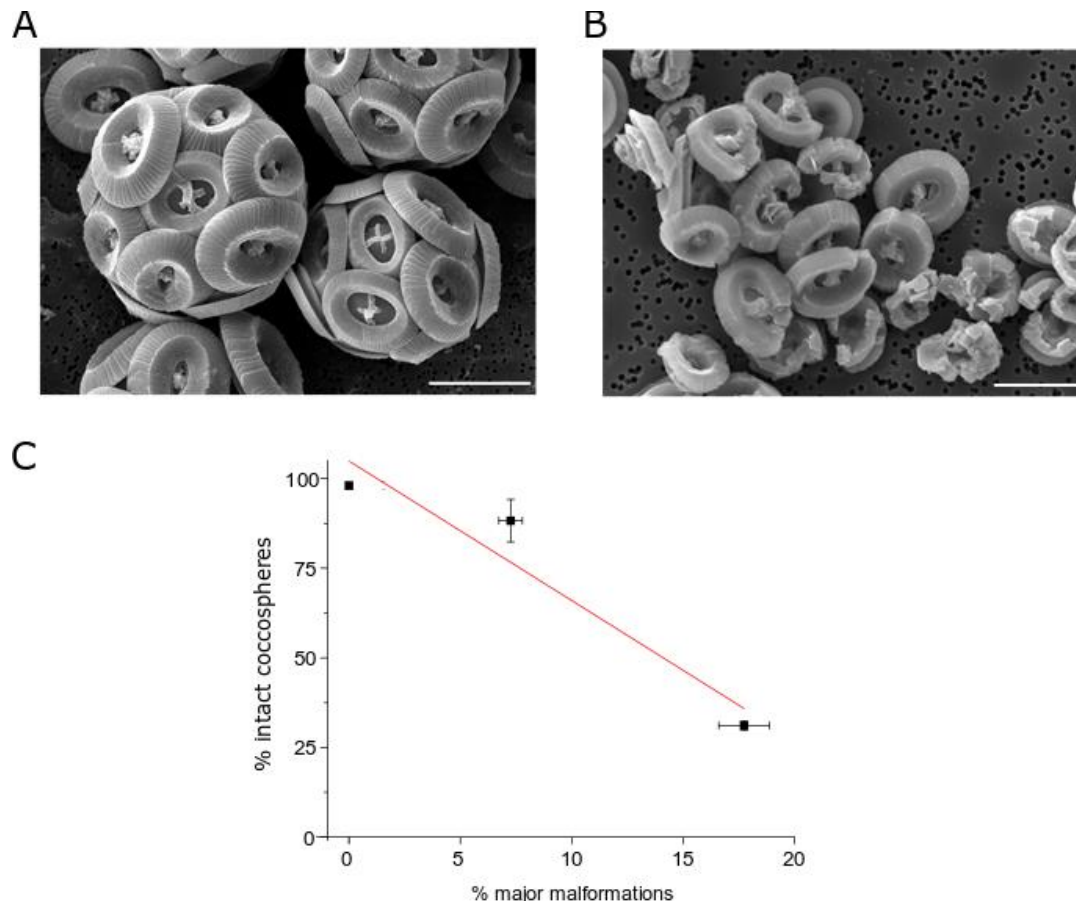

527

528

529 **Figure 3: Effect of coccolith malformations on the *C. braarudii* coccosphere.** A) SEM  
530 image of control cells showing intact coccospheres. Bar = 10  $\mu$ m. B) SEM image from cells  
531 treated with 2  $\mu$ M cytochalasin B showing collapsed coccospheres. Bar = 10  $\mu$ m. C) Percentage  
532 of intact *C. braarudii* coccospheres versus percentage of major malformations in coccoliths.  
533 An increase in the proportion of major malformations correlates with a decrease in the % of  
534 intact coccospheres. Data points represent different treatments (control, vinblastine and  
535 cytochalasin B). The trendline represents linear regression with an  $r^2$  of 0.92. n= 3 replicate  
536 treatments. Error bars represent SD.

537

538



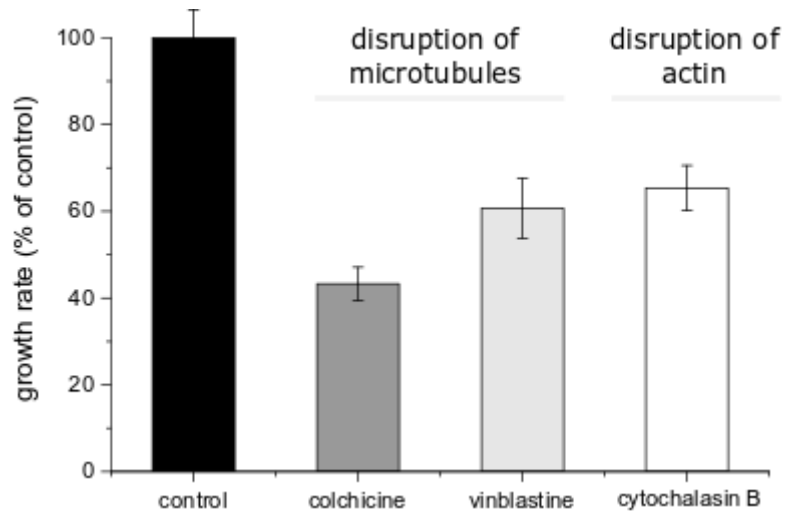

539

540 **Figure 4: Effects of cytoskeletal inhibitors on growth of *S. apsteinii*.** Specific growth rate  
541 of *S. apsteinii* (shown relative to the control) following treatment with 20  $\mu$ M colchicine, 1.25  
542  $\mu$ M vinblastine or 1  $\mu$ M cytochalasin B. n = 3 cultures for each treatment. Error bars represent  
543 SD.

544

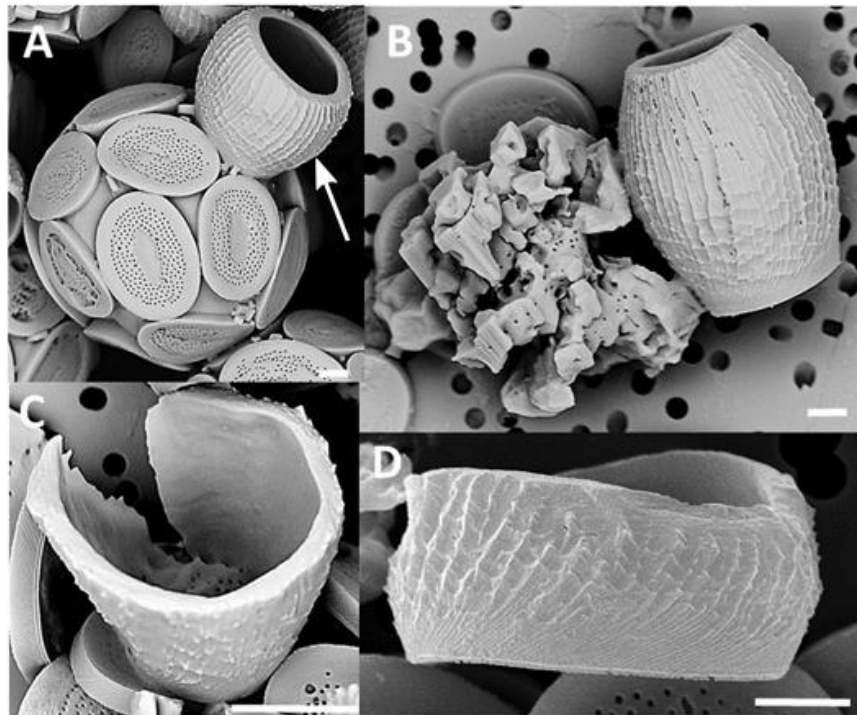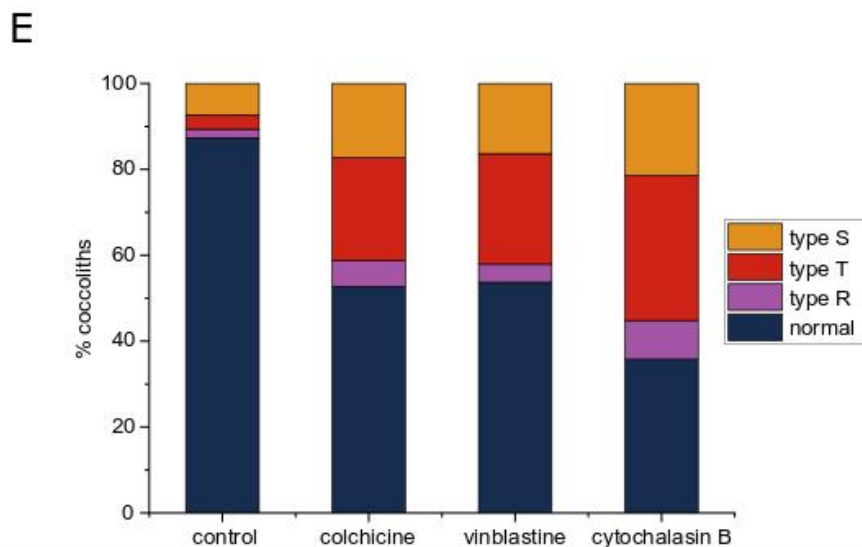

545

546

547 **Figure 5: Scanning electron micrographs of the morphological categories of *S. apsteinii***

548 **coccoliths.** Representative SEM images of the categories used to quantify coccolith

549 morphology. A) Intact coccosphere with disc-like muroliths and barrel-shaped lopadolith

550 (arrowed) exhibiting normal morphology, B) type T (heavily malformed, loss of barrel shape)

551 (left) and normal (right), C) type R, lopadoliths barrel formed normally except that it does not

552 form a closed cylinder. D) type S, short lopadolith with no obvious teratological malformation.

553 Coccoliths shown in B, C, and D are lopadoliths. Scale bars 2  $\mu$ m in A, B, D, and 5  $\mu$ m in C.

554 E) Quantitation of coccolith morphology in *S. apsteinii*. Bars from bottom up represent the  
555 morphological categories (% of counted): normal, type R, type T, type S. A minimum of 300  
556 coccoliths were assessed for each sample, with values representing means of triplicate  
557 treatments.

558 **Supplementary Information**

559

560 Supplementary Figure 1

561 Supplementary Table 1

562

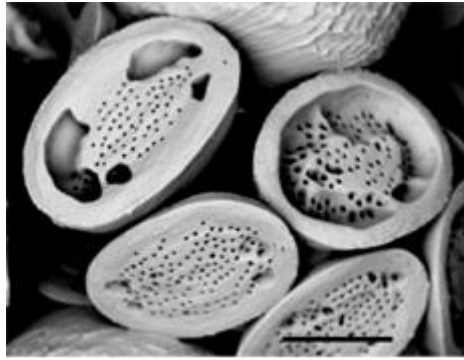

563

564

565 **Supplementary Figure 1: Cytoskeleton inhibitors also induce malformations in *S.***  
566 ***apsteinii* muroliths.** In addition to barrel-shaped lopadoliths, *S. apsteinii* also produces disc-  
567 like muroliths (Figure 5). Muroliths also exhibited distinct malformations in cells treated with  
568 cytoskeleton inhibitors, although these were not quantified. The SEM image shown illustrates  
569 malformed muroliths from a *S. apsteinii* cell treated with 1  $\mu\text{M}$  cytochalasin B. Bar = 4  $\mu\text{m}$ .

570

571

| <b>Species</b>                      | <b>Cytoskeleton inhibitor</b> | <b>Mode of action</b>                              | <b>Concentration used</b> |
|-------------------------------------|-------------------------------|----------------------------------------------------|---------------------------|
| <b>Microtubule inhibitors</b>       |                               |                                                    |                           |
| <i>E. huxleyi</i><br>(Langer 2010)  | Colchicine                    | Polymerisation inhibitor<br>(colchicine domain)    | 1000 $\mu$ M              |
| <i>C. braarudii</i><br>(Durak 2017) | Nocodazole                    | Polymerisation inhibitor<br>(colchicine domain)    | 17 $\mu$ M                |
| <i>C. braarudii</i><br>This study   | Vinblastine                   | Polymerisation inhibitor<br>(vinca domain)         | 2 $\mu$ M                 |
| <i>S. apsteinii</i><br>This study   | Colchicine                    | Polymerisation inhibitor<br>(colchicine domain)    | 20 $\mu$ M                |
| <i>S. apsteinii</i><br>This study   | Vinblastine                   | Polymerisation inhibitor<br>(vinca domain)         | 1.25 $\mu$ M              |
| <b>Actin inhibitors</b>             |                               |                                                    |                           |
| <i>E. huxleyi</i><br>(Langer 2010)  | Cytochalasin B                | Prevents polymerization                            | 100 $\mu$ M               |
| <i>C. braarudii</i><br>(Durak 2017) | Latrunculin B                 | Prevent polymerization<br>enhance depolymerisation | 1 $\mu$ M                 |
| <i>C. braarudii</i><br>This study   | Cytochalasin B                | Prevents polymerization                            | 1.5 $\mu$ M               |
| <i>S. apsteinii</i><br>This study   | Cytochalasin B                | Prevents polymerization                            | 1 $\mu$ M                 |

572

573

574 **Supplementary Table 1: Summary of cytoskeleton inhibitors used to disrupt**  
 575 **coccolithophore calcification**
